# Supplementary material for: Structural and spectroscopic characterisation of a heme peroxidase from sorghum
Source: PubMed Central journal article supplement (PMC4771821; doi:10.1007/s00775-015-1313-z), 2015-12-14
Supplement: 775_2015_1313_MOESM1_ESM.pdf [file 775_2015_1313_MOESM1_ESM.pdf]

## Structural and spectroscopic characterisation of a heme peroxidase from sorghum

Chukwudi I. Nnamchi<sup>1</sup>, Gary Parkin<sup>2</sup>, Igor Efimov<sup>2</sup>, Jaswir Basran<sup>3</sup>, Hanna Kwon<sup>3</sup>, Dimitri A. Svistunenko<sup>4</sup>, Jon Agirre<sup>5</sup>, Bartholomew N. Okolo<sup>1</sup>, Anene Moneke<sup>1</sup>, Bennett C. Nwanguma<sup>6</sup>, Peter C. E. Moody<sup>3</sup>, Emma L. Raven<sup>2,\*</sup>

<sup>1</sup> Department of Microbiology, University of Nigeria, Nsukka

<sup>2</sup> Department of Chemistry, University of Leicester, University Road, Leicester, LE1 7RH, UK

<sup>3</sup> Department of Molecular and Cell Biology, Henry Wellcome Laboratory for Structural Biology, University of Leicester, Lancaster Road, Leicester, LE1 9HN, UK

<sup>4</sup> School of Biological Sciences, University of Essex, Wivenhoe Park, Colchester CO4 3SQ, UK

<sup>5</sup> York Structural Biology Laboratory, Department of Chemistry, The University of York, Heslington, York, YO10 5DD, UK

<sup>6</sup> Department of Biochemistry, University of Nigeria, Nsukka

**Figure S1.** Sequence alignment of sorghum peroxidase, BP1, HRP and PNP. The sorghum peroxidase has the highest sequence identity to BP1 (69 %) then to PNP (45 %) and HRP (44 %). The figure was generated by ESPript (1).

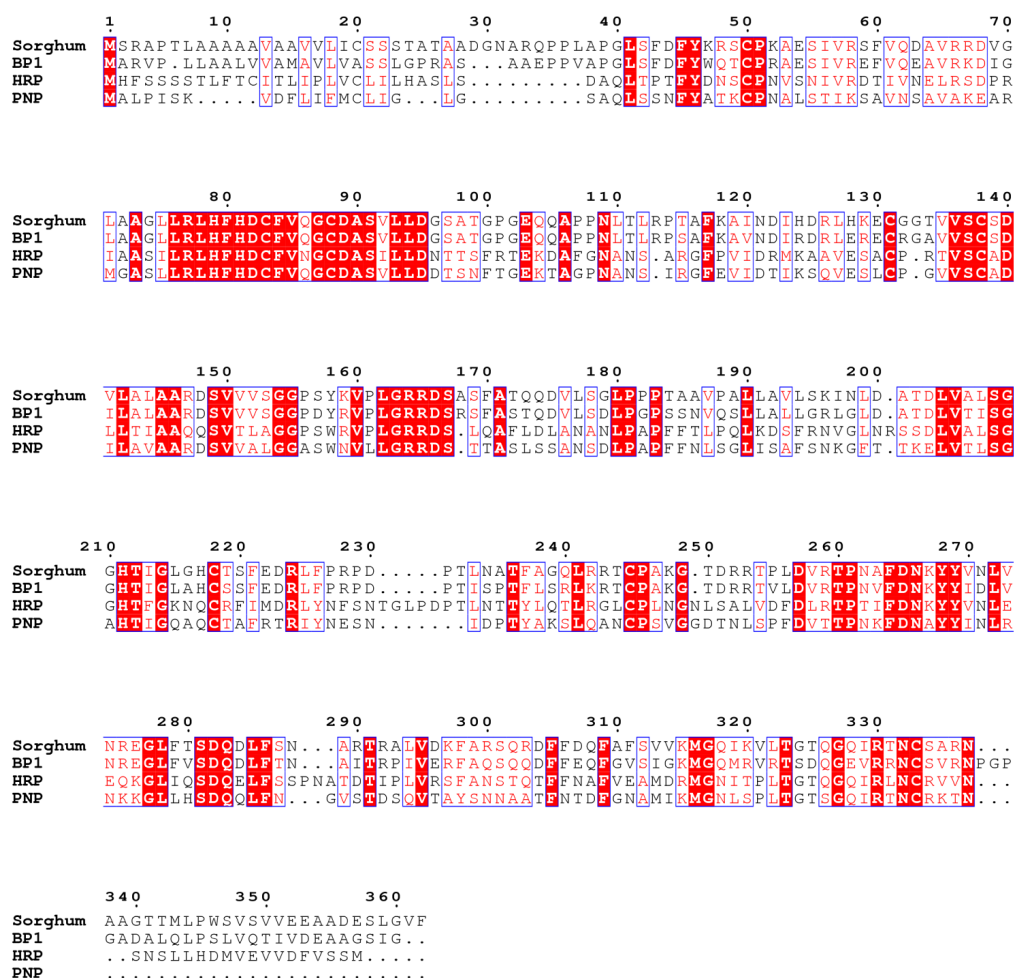

**Figure S2.** Comparison of the active sites of (A) sorghum peroxidase, (B) HRP, (C) BP1 and (D) PNP. The sorghum peroxidase is the only structure with 5-coordinated heme. The sorghum and BP1 enzymes shares some structural characteristics such as re-orientation of the distal histidine, presence of structural water molecules (W83 in sorghum and W626 in BP1) and the presence of a leucine residue in the proximal heme pocket (instead of phenylalanine residues found in HRP and PNP). Water molecules are shown as red spheres.

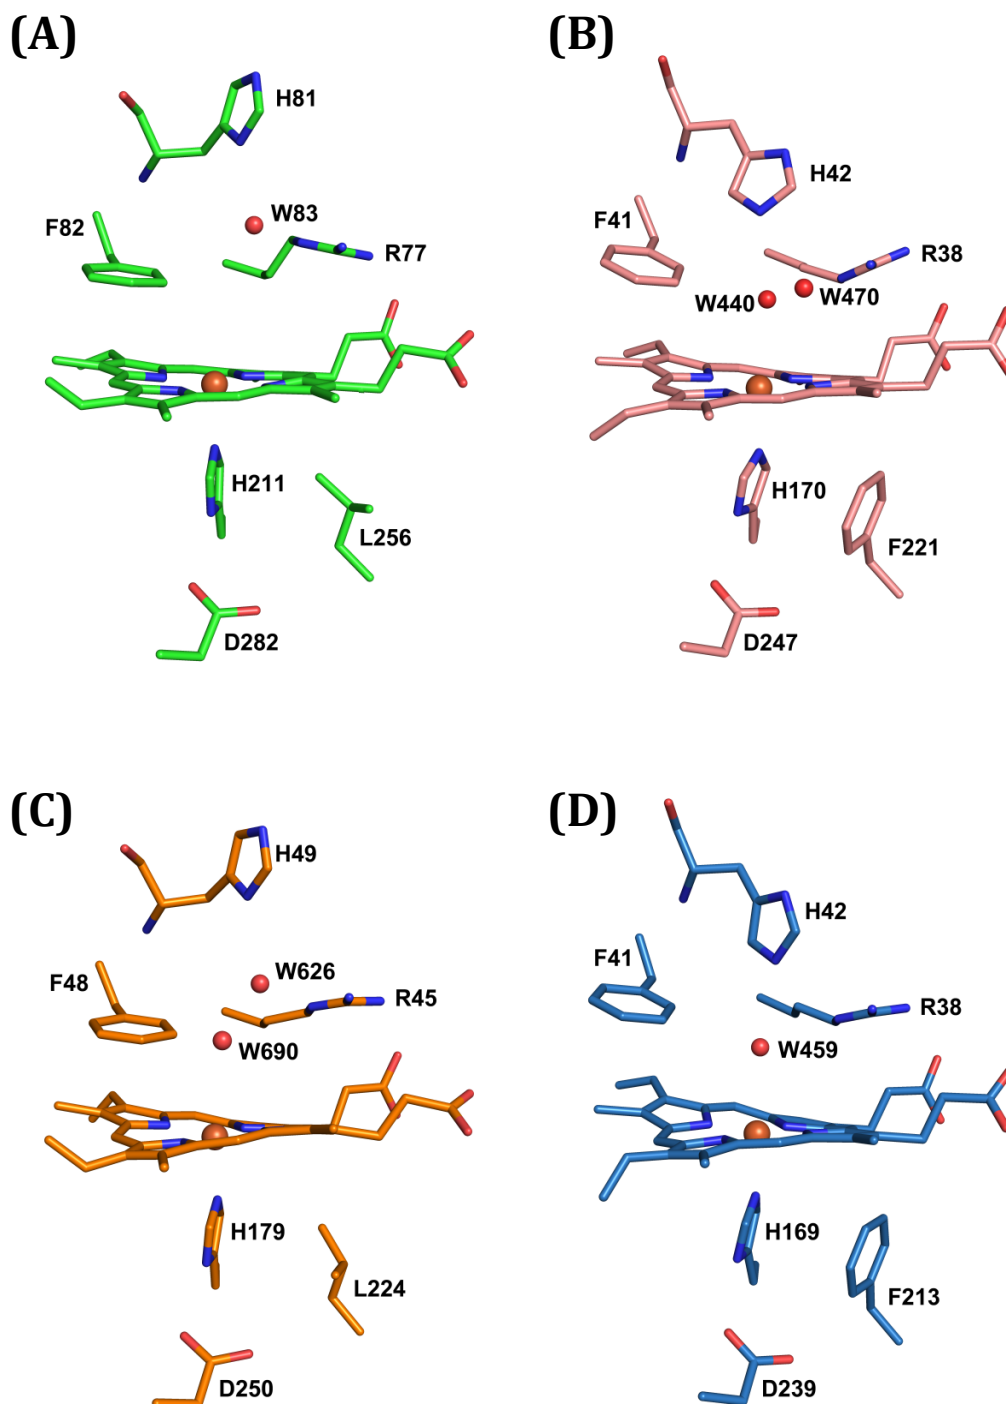

1. Gouet P, Robert X, & Courcelle E (2003) ESPript/ENDscript: Extracting and rendering sequence and 3D information from atomic structures of proteins. *Nucleic acids research* 31(13):3320-3323.
